# Supplementary material for: Tracer kinetic modelling for DCE-MRI quantification of subtle blood–brain barrier permeability
Source: PubMed Central journal article supplement (PMC4692516; doi:10.1016/j.neuroimage.2015.10.018), 2016-01-15

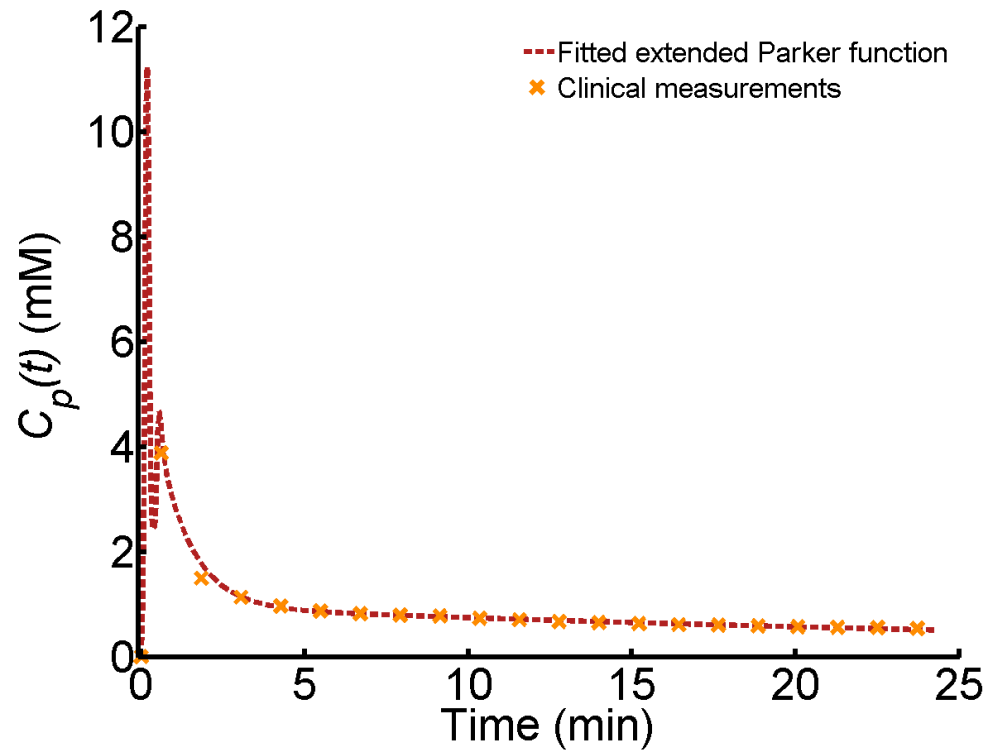

Supplement: mmc1.pdf [file mmc1.pdf]
